# Supplementary material for: Understanding the structural properties of p-xylylenebis(triphenylphosphonium) cation under different pH and anion conditions
Source: Royal Society of Chemistry journal article supplement (doi:10.1039/d0ce01274b), 2020-01-01
Supplement: d0ce01274b1.pdf [file d0ce01274b1.pdf]

# Understanding the structural properties of *p*-xylylenebis(triphenylphosphonium) cation under influence of different pH and anions

Irene Ling\*, Alexandre N. Sobolev, Brian W. Skelton and Colin L. Raston

## Supporting Information (SI)

### Structural analysis

Table S1. *p*-Sulfonated calix[4]arene dihedral angles for compounds **3** to **5**.

| Compound          | Dihedral angles                                                  |
|-------------------|------------------------------------------------------------------|
| Compound <b>3</b> | <i>Calixarene 1</i> :<br>67.1(7)°, 51.9(4)°, 69.1(8)°, 43.4(6)°  |
|                   | <i>Calixarene 2</i> :<br>57.8(5)°, 44.6(8)°, 74.7(6)°, 41.2(7)°  |
| Compound <b>4</b> | <i>Calixarene 1</i> :<br>59.7(2)°, 57.3(1)°, 53.3(1)°, 49.3(1)°  |
|                   | <i>Calixarene 2</i> :<br>56.0(2)°, 72.2(1)°, 48.1(1)°, 50.6(2)°  |
| Compound <b>5</b> | <i>Calixarene 1</i> :<br>72.0 (6)°, 43.5(5)°, 55.4(5)°, 43.8(6)° |
|                   | <i>Calixarene 2</i> :<br>57.1(7)°, 39.2(6)°, 72.2 (5)°, 43.5(8)° |

## Hirshfeld surface analysis

Table S2. Summary of percentages of contribution for key intermolecular interactions pertaining to *p*-sulfonated calix[4]arene for compounds **3** to **5**.

| <b>Contacts</b>             | <b>Compound 3</b> | <b>Compound 4</b> | <b>Compound 5</b> |
|-----------------------------|-------------------|-------------------|-------------------|
| H...H (%)                   | 23.9              | 34.8              | 19.6              |
| H... $\pi$ / $\pi$ ...H (%) | 20.5              | 17.2              | 17.2              |
| H...O/O...H (%)             | 48.4              | 44.0              | 33.1              |
| $\pi$ ... $\pi$ (%)         | 2.0               | 1.6               | 1.9               |

Table S3. Selected hydrogen-bond parameters and short intermolecular contacts (Å, °) for compound **3**.

| $D-H\cdots A$                          | $d(D-H)$ | $d(H\cdots A)$ | $d(D\cdots A)$ | $\angle(D-H\cdots A)$ |
|----------------------------------------|----------|----------------|----------------|-----------------------|
| O1A-H1A $\cdots$ O2A                   | 0.84     | 1.75           | 2.59(3)        | 173                   |
| O2A-H2A $\cdots$ O3A                   | 0.84     | 2.16           | 2.92(3)        | 150                   |
| O2A-H2A $\cdots$ O4A                   | 0.84     | 2.65           | 3.27(2)        | 131                   |
| O3A-H3A $\cdots$ O4A                   | 0.84     | 1.95           | 2.78(3)        | 169                   |
| O4A-H4A $\cdots$ O1A                   | 0.84     | 1.76           | 2.56(3)        | 161                   |
| O1B-H1B $\cdots$ O2B                   | 0.84     | 1.61           | 2.45(3)        | 177                   |
| O2B-H2B $\cdots$ O3B                   | 0.84     | 2.15           | 2.94(3)        | 157                   |
| O3B-H3B $\cdots$ O4B                   | 0.84     | 2.03           | 2.85(3)        | 165                   |
| O4B-H4B $\cdots$ O1B                   | 0.84     | 1.89           | 2.73(3)        | 171                   |
| C101-H10B $\cdots$ O31A                | 0.99     | 2.65           | 3.31(3)        | 124                   |
| C102-H10D $\cdots$ O32B <sup>i</sup>   | 0.99     | 2.34           | 3.23(4)        | 148                   |
| C201-H20A $\cdots$ O12B                | 0.99     | 2.52           | 3.16(3)        | 122                   |
| C202-H20D $\cdots$ O21B <sup>i</sup>   | 0.99     | 2.20           | 3.16(4)        | 165                   |
| C301-H30A $\cdots$ O33A <sup>ii</sup>  | 0.99     | 2.26           | 3.23(3)        | 165                   |
| C301-H30B $\cdots$ O13B <sup>iii</sup> | 0.99     | 2.36           | 3.35(3)        | 174                   |
| C302-H30C $\cdots$ O13A <sup>iv</sup>  | 0.99     | 2.22           | 3.16(3)        | 158                   |
| C302-H30D $\cdots$ O42B                | 0.99     | 2.40           | 3.35(3)        | 160                   |
| C401-H40B $\cdots$ O13A <sup>v</sup>   | 0.99     | 2.49           | 3.47(3)        | 172                   |
| C402-H40C $\cdots$ O13B <sup>iv</sup>  | 0.99     | 2.27           | 3.22(3)        | 160                   |
| C402-H40D $\cdots$ O33A                | 0.99     | 2.32           | 3.29(3)        | 167                   |

Symmetry codes: (i)  $x-1, y, z$ ; (ii)  $x, y, z-1$ ; (iii)  $-x+1, y+1/2, -z$ ; (iv)  $-x+1, y+1/2, -z+1$ ; (v)  $-x+1, y+1/2, -z+2$ .

Table S4. Selected hydrogen-bond parameters and short intermolecular contacts (Å, °) for compound 4.

| $D-H\cdots A$                   | $d(D-H)$ | $d(H\cdots A)$ | $d(D\cdots A)$ | $\angle(D-H\cdots A)$ |
|---------------------------------|----------|----------------|----------------|-----------------------|
| O1A-H1A <sup>i</sup> ···O4A     | 0.85     | 1.71           | 2.557(6)       | 177                   |
| O2A-H2A···O3A                   | 0.85     | 1.67           | 2.523(6)       | 178                   |
| O4A-H4A···O3A                   | 0.85     | 1.65           | 2.500(5)       | 172                   |
| O1B-H1B···O4B                   | 0.85     | 1.71           | 2.558(6)       | 174                   |
| O2B-H2B···O3B                   | 0.85     | 1.91           | 2.725(6)       | 160                   |
| O4B-H4B···O1B                   | 0.85     | 1.72           | 2.558(6)       | 169                   |
| O01W-H01Y···O12A                | 0.85     | 1.90           | 2.708(4)       | 157                   |
| O01W-H01Y···O11A                | 0.85     | 2.32           | 2.894(4)       | 125                   |
| O01W-H01Z···O11B                | 0.85     | 1.98           | 2.801(5)       | 163                   |
| O02W-H02Y···O43A <sup>i</sup>   | 0.85     | 1.90           | 2.721(4)       | 163                   |
| O02W-H02Z···O34W                | 0.85     | 1.89           | 2.634(13)      | 146                   |
| O02W-H02Z···O40W                | 0.85     | 2.00           | 2.822(13)      | 164                   |
| O03W-H03Y···O11B                | 0.85     | 1.96           | 2.774(6)       | 161                   |
| O03W-H03Z···O21B                | 0.85     | 1.88           | 2.698(6)       | 160                   |
| O04W-H04Y···C11                 | 0.85     | 2.42           | 3.2421(16)     | 164                   |
| O04W-H04Z···O21B                | 0.85     | 1.88           | 2.719(5)       | 168                   |
| O05W-H05Y···C11                 | 0.85     | 2.39           | 3.2358(18)     | 177                   |
| O05W-H05Z···O22A                | 0.85     | 1.88           | 2.732(4)       | 177                   |
| O06W-H06Y···O21A                | 0.85     | 1.88           | 2.730(4)       | 178                   |
| O06W-H06Z···O43A <sup>i</sup>   | 0.85     | 1.88           | 2.731(5)       | 178                   |
| O07W-H07Y···O23W                | 0.85     | 1.82           | 2.665(8)       | 171                   |
| O07W-H07Z···O42W                | 0.85     | 1.87           | 2.711(14)      | 170                   |
| O07W-H07Z···O33W                | 0.85     | 2.14           | 2.879(11)      | 145                   |
| O08W-H08Y···O23A <sup>ii</sup>  | 0.85     | 2.10           | 2.945(4)       | 179                   |
| O08W-H08Z···O09W <sup>ii</sup>  | 0.85     | 1.97           | 2.822(6)       | 178                   |
| O09W-H09Y···O32A <sup>i</sup>   | 0.85     | 2.02           | 2.855(4)       | 166                   |
| O09W-H09Z···O41A <sup>i</sup>   | 0.85     | 1.98           | 2.809(4)       | 165                   |
| O11W-H11Y···O41B <sup>iii</sup> | 0.85     | 1.92           | 2.766(4)       | 176                   |
| O11W-H11Z···O21W                | 0.85     | 1.92           | 2.764(6)       | 175                   |
| O12W-H12Y···O11W                | 0.85     | 2.06           | 2.895(6)       | 166                   |
| O12W-H12Z···O24W                | 0.85     | 1.90           | 2.728(7)       | 166                   |
| O13W-H13Y···O36B                | 0.85     | 2.00           | 2.828(11)      | 163                   |
| O13W-H13Y···O31B                | 0.85     | 2.07           | 2.893(6)       | 162                   |
| O13W-H13Z···O32W                | 0.85     | 1.93           | 2.754(10)      | 164                   |
| O13W-H13Z···O43W                | 0.85     | 2.15           | 2.90(2)        | 147                   |
| O14W-H14Y···O23A <sup>ii</sup>  | 0.85     | 2.02           | 2.867(4)       | 177                   |
| O14W-H14Z···O22W <sup>iv</sup>  | 0.85     | 1.92           | 2.769(3)       | 178                   |
| O15W-H15Y···O4B                 | 0.85     | 2.08           | 2.925(4)       | 173                   |
| O15W-H15Z···O12W                | 0.85     | 1.92           | 2.765(6)       | 173                   |
| O16W-H16Y···O21A <sup>v</sup>   | 0.85     | 2.08           | 2.911(4)       | 167                   |
| O16W-H16Z···O09W <sup>v</sup>   | 0.85     | 2.02           | 2.856(3)       | 167                   |
| O17W-H17Y···O33A <sup>vi</sup>  | 0.85     | 1.99           | 2.831(5)       | 172                   |
| O17W-H17Z···O08W                | 0.85     | 2.07           | 2.910(7)       | 172                   |
| O18W-H18Y···O11W                | 0.85     | 1.95           | 2.796(7)       | 180                   |
| O18W-H18Z···O20W                | 0.85     | 1.92           | 2.772(8)       | 179                   |
| O19W-H19Y···O1A <sup>vii</sup>  | 0.85     | 1.91           | 2.761(4)       | 174                   |
| O19W-H19Z···O12B <sup>iii</sup> | 0.85     | 1.88           | 2.731(5)       | 174                   |
| O20W-H20Y···O13B <sup>iii</sup> | 0.85     | 2.06           | 2.862(5)       | 158                   |
| O20W-H20Z···O19W                | 0.85     | 1.98           | 2.785(8)       | 158                   |
| O21W-H21Y···O2A <sup>vii</sup>  | 0.85     | 2.08           | 2.917(4)       | 170                   |
| O21W-H21Z···O19W                | 0.85     | 1.87           | 2.713(8)       | 169                   |
| O22W-H22Y···O16W                | 0.85     | 1.99           | 2.813(7)       | 164                   |
| O22W-H22Z···O17W <sup>iv</sup>  | 0.85     | 2.02           | 2.850(3)       | 164                   |
| O23W-H23Y···O42A <sup>i</sup>   | 0.85     | 1.91           | 2.754(4)       | 175                   |
| O23W-H23Z···O40W                | 0.85     | 2.45           | 2.886(12)      | 113                   |
| O23W-H23Z···O37W                | 0.85     | 2.25           | 2.951(16)      | 140                   |
| O23W-H23Z···O34W                | 0.85     | 2.88           | 3.342(14)      | 116                   |
| O24W-H24Y···O2B                 | 0.85     | 2.23           | 3.059(5)       | 165                   |
| O24W-H24Y···O1B                 | 0.85     | 2.45           | 2.920(4)       | 116                   |
| O24W-H24Z···O18W                | 0.85     | 1.97           | 2.796(8)       | 165                   |
| O25W-H25Y···O33A <sup>vi</sup>  | 0.85     | 1.96           | 2.781(5)       | 164                   |
| O25W-H25Z···O13W                | 0.85     | 1.93           | 2.762(7)       | 164                   |
| O26W-H26Y···O14W                | 0.85     | 1.90           | 2.736(8)       | 168                   |

|                  |      |      |           |     |
|------------------|------|------|-----------|-----|
| O27W-H27Y...O13B | 0.85 | 2.07 | 2.894(5)  | 163 |
| O27W-H27Z...O22B | 0.85 | 2.05 | 2.865(6)  | 162 |
| O28W-H28Y...O22B | 0.85 | 2.11 | 2.906(6)  | 157 |
| O28W-H28Z...O33B | 0.85 | 2.09 | 2.827(7)  | 145 |
| O28W-H28Z...O35B | 0.85 | 2.23 | 3.051(13) | 163 |
| O29W-H29Y...O23B | 0.85 | 1.92 | 2.738(6)  | 160 |
| O29W-H29Z...O35W | 0.85 | 2.21 | 3.02(2)   | 160 |
| O29W-H29Z...O38W | 0.85 | 2.17 | 2.888(15) | 142 |

---

Symmetry codes: (i)  $x-1, y, z$ ; (ii)  $x, y-1, z$ ; (iii)  $x+1, y, z$ ; (iv)  $-x+1, -y, -z$ ; (v)  $-x+1, -y+1, -z$ ; (vi)  $x-1, y-1, z$ ; (vii)  $-x+2, -y+1, -z$ .

Table S5. Selected hydrogen-bond parameters and short intermolecular contacts (Å, °) for compound **5**.

| <i>D</i> — <i>H</i> ··· <i>A</i> | <i>d</i> ( <i>D</i> — <i>H</i> ) | <i>d</i> ( <i>H</i> ··· <i>A</i> ) | <i>d</i> ( <i>D</i> ··· <i>A</i> ) | ∠( <i>D</i> — <i>H</i> ··· <i>A</i> ) |
|----------------------------------|----------------------------------|------------------------------------|------------------------------------|---------------------------------------|
| O1A-H1A···O4A                    | 0.84                             | 2.02                               | 2.80(2)                            | 155                                   |
| O2A-H2A···O1A                    | 0.84                             | 1.93                               | 2.76(2)                            | 167                                   |
| O3A-H3A···O2A                    | 0.84                             | 1.59                               | 2.428(19)                          | 171                                   |
| O4A-H4A···O3A                    | 0.84                             | 1.67                               | 2.49(2)                            | 165                                   |
| O1B-H1B···O4B                    | 0.84                             | 1.61                               | 2.440(18)                          | 171                                   |
| O2B-H2B···O1B                    | 0.84                             | 1.81                               | 2.55(2)                            | 146                                   |
| O3B-H3B···O2B                    | 0.84                             | 2.07                               | 2.84(2)                            | 153                                   |
| O4B-H4B···O3B                    | 0.84                             | 1.99                               | 2.81(2)                            | 165                                   |
| O1C-H1C···O4C                    | 0.84                             | 1.98                               | 2.78(2)                            | 158                                   |
| O2C-H2C···O1C                    | 0.84                             | 2.03                               | 2.82(2)                            | 158                                   |
| O3C-H3C···O2C                    | 0.84                             | 1.74                               | 2.57(2)                            | 168                                   |
| O4C-H4C···O3C                    | 0.84                             | 1.80                               | 2.54(2)                            | 146                                   |
| C101-H10A···O33B                 | 0.99                             | 2.36                               | 3.32(4)                            | 164                                   |
| C101-H10B···O25W                 | 0.99                             | 2.35                               | 3.32(3)                            | 167                                   |
| C102-H10C···O13A                 | 0.99                             | 2.43                               | 3.34(3)                            | 153                                   |
| C102-H10D···O29W                 | 0.99                             | 2.36                               | 3.34(3)                            | 168                                   |
| C201-H20A···O22B <sup>ii</sup>   | 0.99                             | 2.33                               | 3.24(3)                            | 152                                   |
| C201-H20B···O30W <sup>iii</sup>  | 0.99                             | 2.31                               | 3.28(4)                            | 169                                   |
| C202-H20D···O21C <sup>ii</sup>   | 0.99                             | 2.45                               | 3.24(3)                            | 136                                   |
| C301-H30A···O42A <sup>iv</sup>   | 0.99                             | 2.07                               | 3.01(3)                            | 158                                   |
| C301-H30B···O17W <sup>i</sup>    | 0.99                             | 2.51                               | 3.49(3)                            | 172                                   |
| C302-H30C···O22A                 | 0.99                             | 2.60                               | 3.41(3)                            | 139                                   |
| C302-H30D···O41C                 | 0.99                             | 2.15                               | 3.11(3)                            | 162                                   |
| C401-H40A···O41C <sup>i</sup>    | 0.99                             | 2.20                               | 3.16(3)                            | 162                                   |

Symmetry codes: (i) 1-x, -y, -z; (ii) x, 1+y, z; (iii) 1-x, 1-y, 1-z; (iv) x, y-1, z.
